# Supplementary material
Source: Springer Nature journal article supplement (https://www.springermedizin.de/resource/supplementary/12960_2009_220_MOESM2_ESM.pdf/9570742)

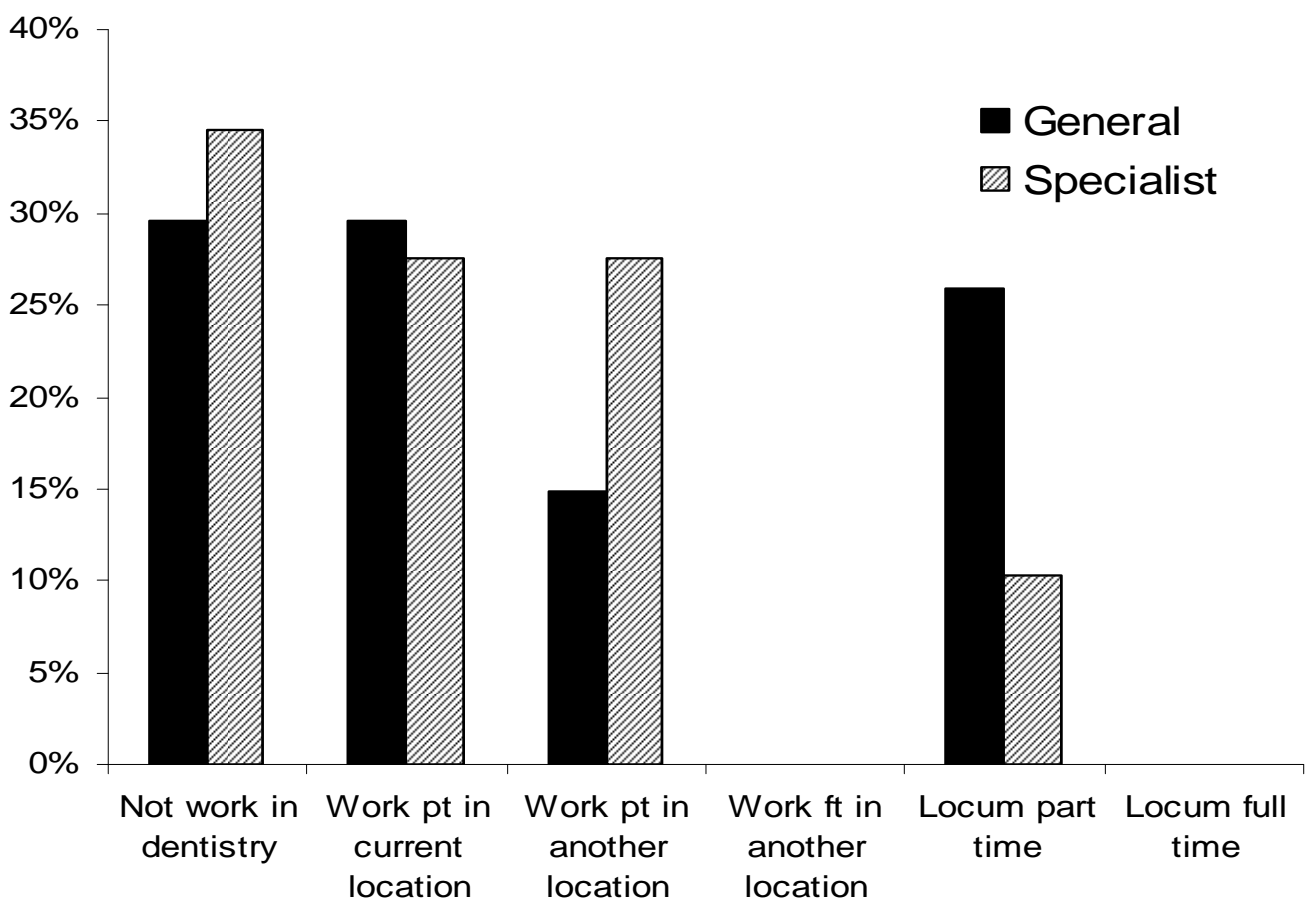

Supplement: MOESM2 [file 9570742]
